# Supplementary material for: AMPED: a new platform for picolinate based luminescent lanthanide chelates
Source: Royal Society of Chemistry journal article supplement (doi:10.1039/c5dt00077g), 2015-01-01
Supplement: c5dt00077g1.pdf [file c5dt00077g1.pdf]

## AMPED: a new platform for picolinate based luminescent lanthanide chelates

Claudia Guanci,<sup>a</sup> Giovanni Giovenzana,<sup>a</sup> Luciano Lattuada<sup>b</sup>, Carlos Platas-Iglesias,<sup>c</sup> and Loïc J. Charbonnière<sup>d\*</sup>

### Supplementary Information

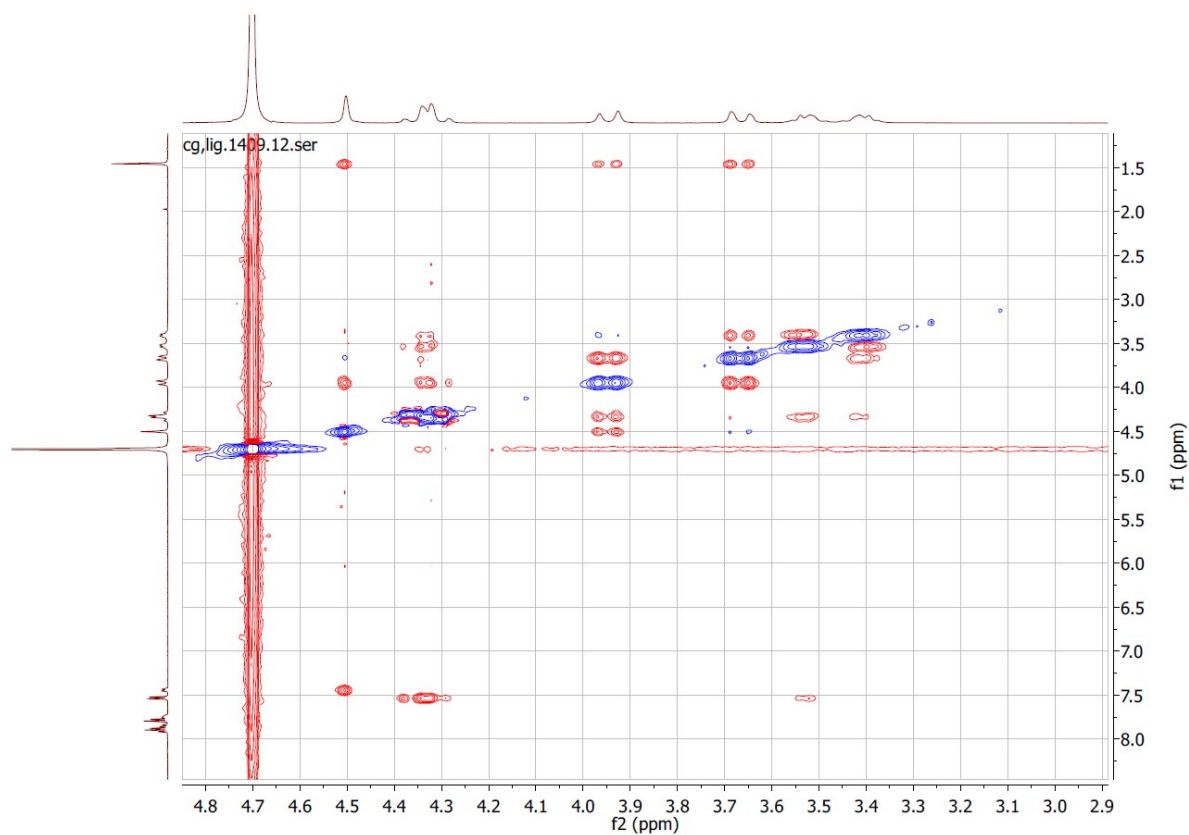

**Figure S1.**  $^1\text{H}$ - $^1\text{H}$  NOESY spectrum of  $\text{LH}_3$  in  $\text{D}_2\text{O}$  (25°C, 400 MHz).

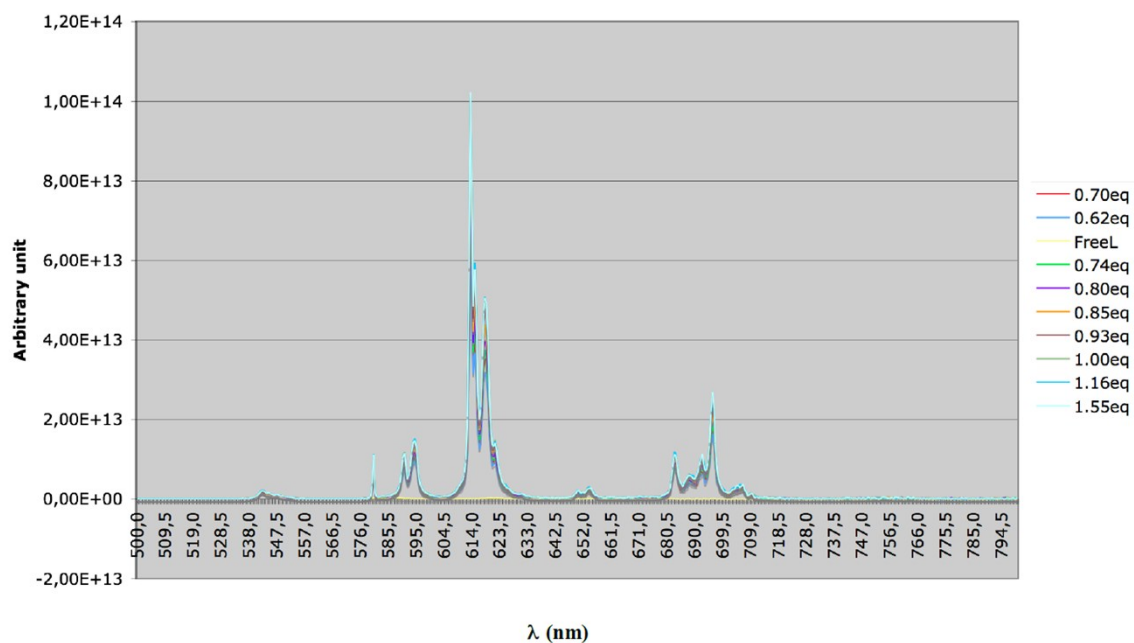

**Figure S2.** Evolution of the emission spectra of a solution of L upon addition of  $\text{EuCl}_3 \cdot 6\text{H}_2\text{O}$  ( $\lambda_{\text{exc}} = 265$  nm, TRIS/HCl, 0.01 M, pH = 7.4). Inset: Evolution of the emitted intensity at 615 nm.

## Analysis Info

Analysis Name Q28023ML.d  
Method esi wide pos.m  
Sample Name Eu-AAz(Pic)/CG21  
Comment

Acquisition Date 07/04/2014 16:54:35  
Operator Administrator  
Instrument micrOTOF

## Acquisition Parameter

|              |          |                    |         |            |           |                 |         |
|--------------|----------|--------------------|---------|------------|-----------|-----------------|---------|
| Source Type  | ESI      | Capillary          | 4500 V  | Nebulizer  | 0.4 Bar   | Corona          | 195 nA  |
| Ion Polarity | Positive | Set Capillary Exit | 150.0 V | Dry Gas    | 4.0 l/min | Set Hexapole RF | 250.0 V |
| n/a          | n/a      | Set Skimmer 1      | 50.0 V  | Dry Heater | 180 °C    | APCI Heater     | 514 °C  |

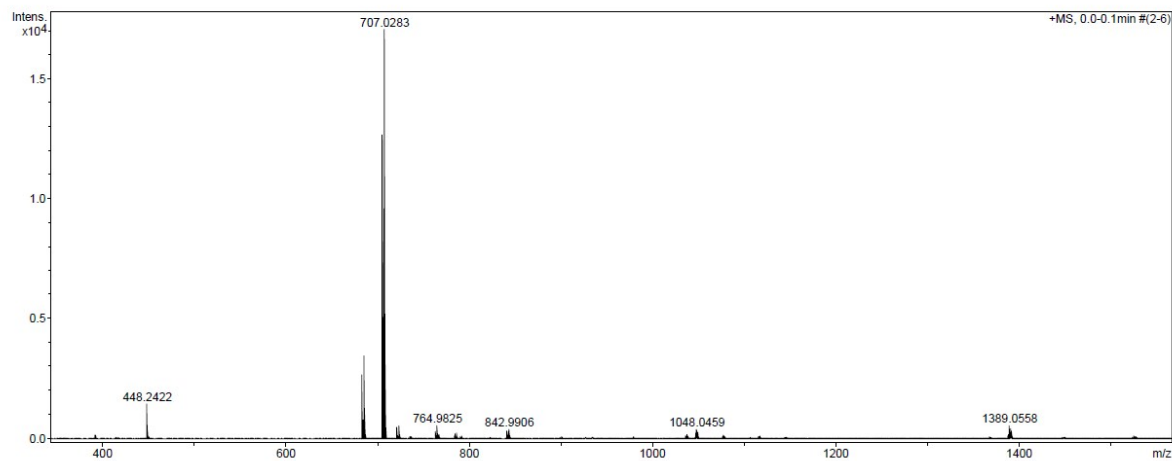

Bruker Daltonics DataAnalysis 3.1

printed: 08/04/2014 15:28:45

Page 1 of 1

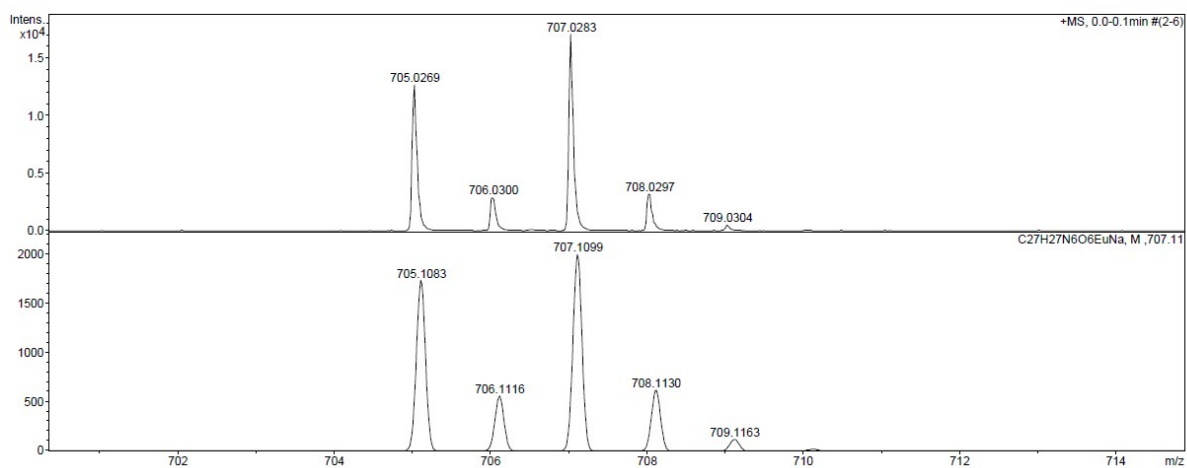

**Figure S3.** ES<sup>+</sup>/MS spectrum of the [EuL] complex in water (top) and enlargement of the major peak with the simulation for [EuL+Na]<sup>+</sup> (bottom).

## Analysis Info

Analysis Name O28024ML.d  
Method esi wide pos.m  
Sample Name Tb-AAz(Pic)/CG22  
Comment

Acquisition Date 07/04/2014 16:57:14  
Operator Administrator  
Instrument micrOTOF

## Acquisition Parameter

|              |          |                    |         |            |           |                 |         |
|--------------|----------|--------------------|---------|------------|-----------|-----------------|---------|
| Source Type  | ESI      | Capillary          | 4500 V  | Nebulizer  | 0.4 Bar   | Corona          | 195 nA  |
| Ion Polarity | Positive | Set Capillary Exit | 200.0 V | Dry Gas    | 4.0 l/min | Set Hexapole RF | 250.0 V |
| n/a          | n/a      | Set Skimmer 1      | 50.0 V  | Dry Heater | 180 °C    | APCI Heater     | 514 °C  |

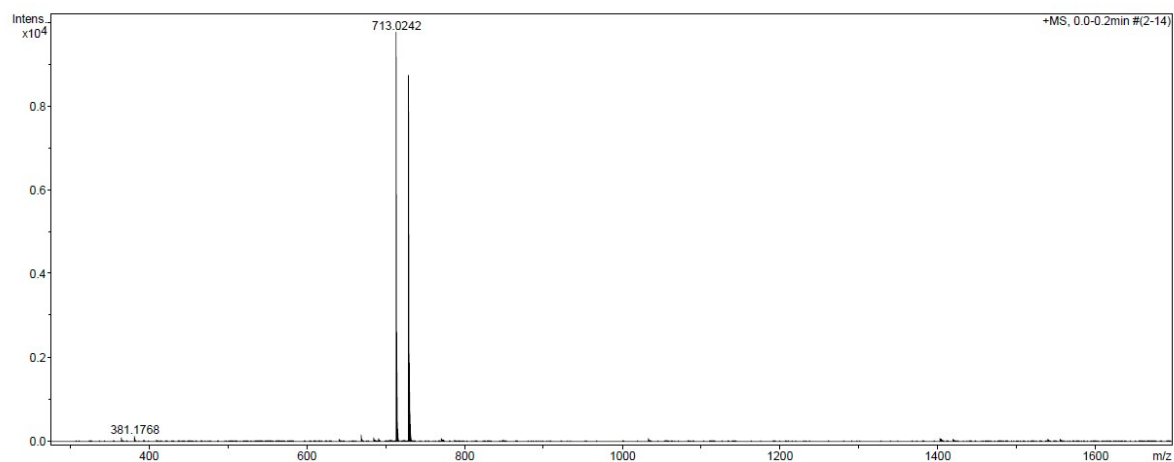

Bruker Daltonics DataAnalysis 3.1

printed: 08/04/2014 15:31:07

Page 1 of 1

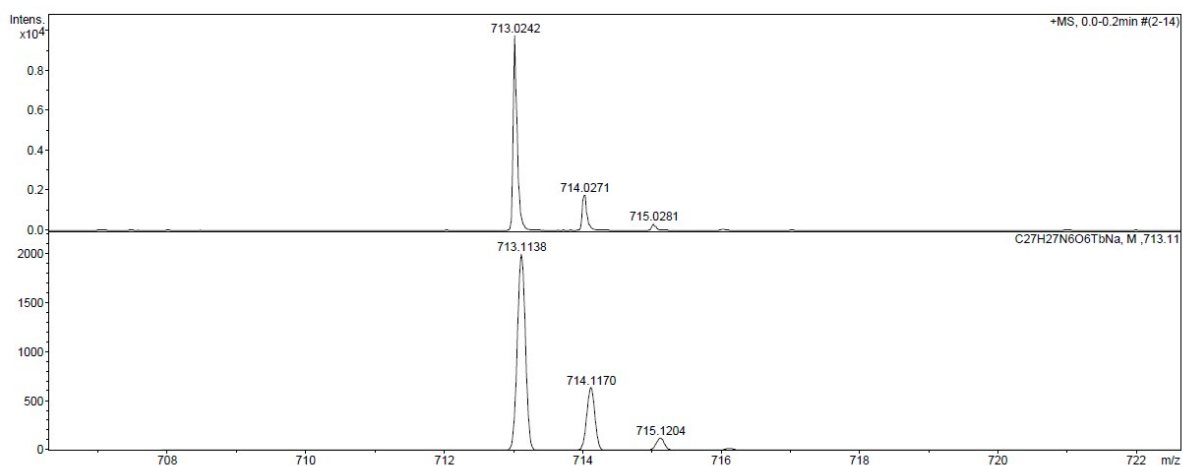

**Figure S4.** ES/MS spectrum of the [TbL] complex in water (top) and enlargement of the major peak with the simulation for [TbL+Na]<sup>+</sup> (bottom).

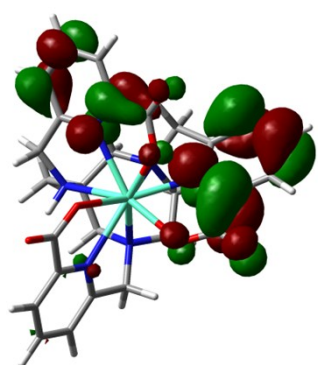

LUMO+2

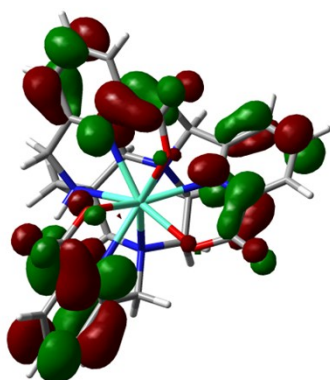

LUMO+1

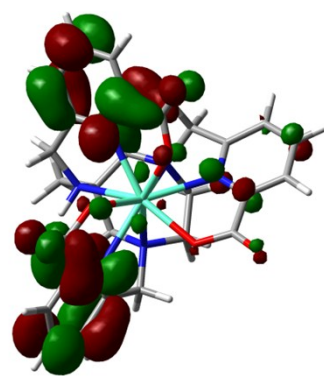

LUMO

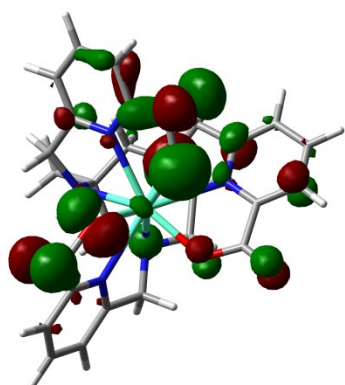

HOMO-5

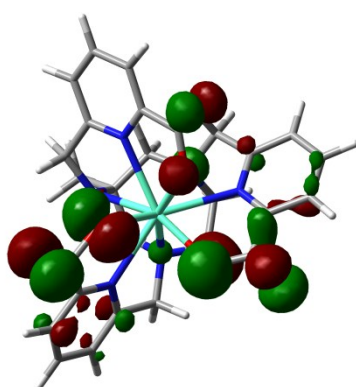

HOMO-6

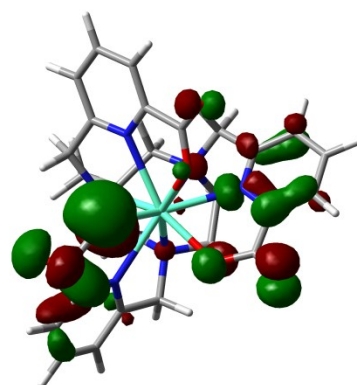

HOMO-8

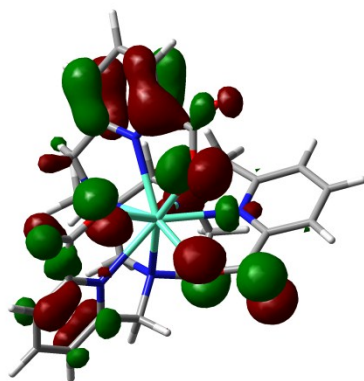

HOMO-9

**Figure S5.** Views of the frontier MOs of [EuL] obtained from DFT calculations in aqueous solution shown with an isosurface value of 0.03 a.u.
